# Supplementary material
Source: MDPI journal article supplement (https://www.mdpi.com/2075-4701/12/10/1598)
Supplement: s1 [file s1]

Archive with 1 entries (1 files):
- metals-1873716-supplementary.pdf
